# Supplementary material for: Dual-responsive microcapsules with tailorable shells from oppositely charged biopolymers for precise pesticide release
Source: Royal Society of Chemistry journal article supplement (doi:10.1039/d2ma01046a), 2023-01-01
Supplement: d2ma01046a1.pdf [file d2ma01046a1.pdf]

## Supplementary Information

### **Dual-responsive microcapsules with tailorable shells from oppositely charged biopolymers for pesticide precise release**

Xiaona Yu <sup>a</sup>, Jie Wang <sup>a,b</sup>, Xue Li <sup>a</sup>, Shuaishuai Ma <sup>a</sup>, Wanbin Zhu <sup>a</sup>, Hongliang Wang

<sup>a, \*</sup>

<sup>a</sup>Center of Biomass Engineering /College of Agronomy and Biotechnology, China  
Agricultural University, Beijing, 100193, P. R. China.

<sup>b</sup>CAS Key Laboratory of Colloid, Interface and Chemical Thermodynamics, Beijing  
National Laboratory for Molecular Sciences (BNLMS), CAS Research/Education  
Center for Excellence in Molecular Sciences, Institute of Chemistry, Chinese Academy  
of Sciences, Beijing 100190, P. R. China.

\* Corresponding author *E-mail address*: [Hlwang@cau.edu.cn](mailto:Hlwang@cau.edu.cn) (Hongliang Wang).

## Experimental section

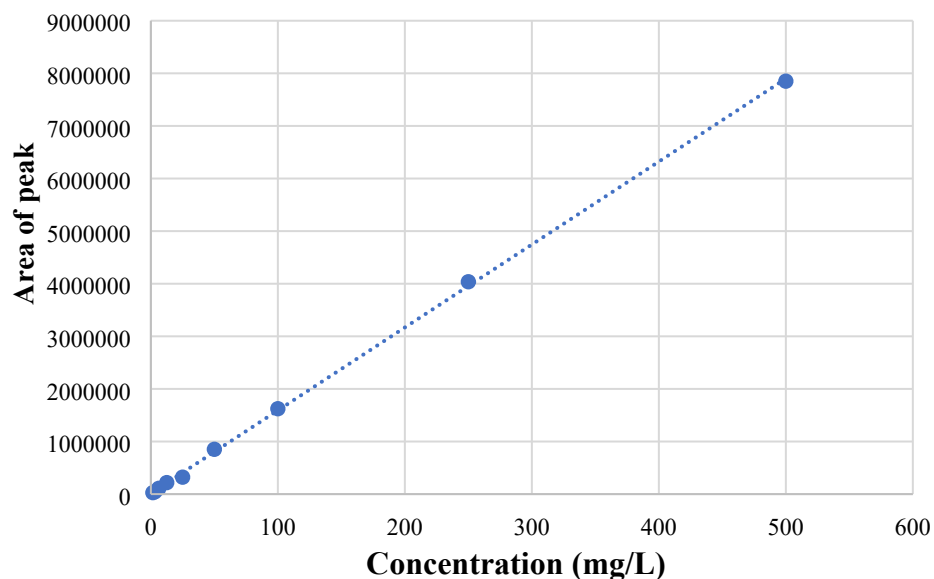

**Fig. S1** The standard curves for determining AVM content.

### Sustained-release behavior of AVM@ $(\text{CH}+\text{SL})_n$

20 mg AVM@ $(\text{CH}+\text{SL})_n$  and laccase (50 U/g, 100 U/g, 500 U/g) were suspended in 20 mL of water and then transferred into a dialysis bag ( $M_w\text{CO} = 1000$  Da). The dialysis bag was submerged into 170 mL of ethanol/water (80/20, v/v) in a glass bottle and then placed in a shaking incubator with an oscillation rate of 200 rpm at a constant 35°C. In order to study the stimulus response to pH, the pH value of the release medium was adjusted to 5, 7, 9, and 11 by sodium hydroxide/hydrochloric acid. At certain intervals, 1 mL medium was taken out to test the AVM concentration by HPLC, and meanwhile, the same volume of fresh ethanol/water solution was added to ensure the same volume of medium.

### Mathematical modelling of *in vitro* release: AVM release kinetics

**Table S1.** Kinetic models used for the analysis of AVM release from

AVM@(CH+SL)n.

| Math. model | Equation                             | Characteristics                                                                                                                       |
|-------------|--------------------------------------|---------------------------------------------------------------------------------------------------------------------------------------|
| Zero-order  | $M_t = M_0 + K_0 t$                  | The release rate of active ingredient is constant and independent of time and drug concentration.                                     |
| First-order | $M_t = M_\infty(1 - e^{-K_1 s t^t})$ | The release rate of the active ingredient is proportional to the concentration of active ingredient in the controlled release system. |
| Higuchi     | $M_t = M_\infty(K_{HG} t^{1/2})$     | The release of active ingredient is proportional to the square root of time, which follows the Fickian diffusion mechanism.           |
| Peppas      | $M_t = M_\infty(K_{KP} t^n)$         | It is an extension of the Higuchi model and only suitable for release data fitting within 60% of cumulative drug release.             |

## Results

**Table S2.** Four models used for explaining kinetics of AVM release from AVM@(CH+SL)*n* and commercial AVM.

|                       | Zero-order Release Model |                | First-order Release Model  |                | Higuchi Model                      |                | Peppas Model                 |                |
|-----------------------|--------------------------|----------------|----------------------------|----------------|------------------------------------|----------------|------------------------------|----------------|
|                       | Kinetic equation         | R <sup>2</sup> | Kinetic equation           | R <sup>2</sup> | Kinetic equation                   | R <sup>2</sup> | Kinetic equation             | R <sup>2</sup> |
| <b>AVM</b>            | $y=0.0029t+0.3787$       | 0.4790         | $y=0.9493(1-e^{-0.0374t})$ | 0.9919         | $y=0.0620 \times t^{1/2} + 0.1548$ | 0.7410         | $y=0.1810 \times t^{0.3242}$ | 0.8236         |
| <b>AVM@(CH+SL)1</b>   | $y=0.0035t+0.2019$       | 0.7297         | $y=0.9684(1-e^{-0.0167t})$ | 0.9956         | $y=0.0688 \times t^{1/2} - 0.0269$ | 0.9150         | $y=0.0754 \times t^{0.4733}$ | 0.9188         |
| <b>AVM@(CH+SL)3</b>   | $y=0.0036t+0.1178$       | 0.8519         | $y=1.0416(1-e^{-0.0096t})$ | 0.9940         | $y=0.0677 \times t^{1/2} - 0.0950$ | 0.9640         | $y=0.0374 \times t^{0.3244}$ | 0.9506         |
| <b>AVM@(CH+SL)5</b>   | $y=0.0034t+0.0719$       | 0.9018         | $y=1.1072(1-e^{-0.0065t})$ | 0.9847         | $y=0.0631 \times t^{1/2} - 0.1196$ | 0.9592         | $y=0.0210 \times t^{0.6808}$ | 0.9551         |
| <b>Commercial AVM</b> | $y=0.0035t+0.2155$       | 0.7089         | $y=0.9950(1-e^{-0.0173t})$ | 0.9948         | $y=0.0705 \times t^{1/2} - 0.0200$ | 0.9059         | $y=0.0819 \times t^{0.4638}$ | 0.9085         |

**Table S3.** Toxicity of pure AVM, AVM@(CH+SL)<sub>n</sub>, and commercial AVM against *P. xylostella* larvae at 0, 3, 7, and 15 days after spraying.

| <b>Sample</b>         | <b>Time after spraying</b> | <b>LC<sub>50</sub> (95% Confidence interval) (mg/L)</b> |
|-----------------------|----------------------------|---------------------------------------------------------|
| <b>AVM</b>            | <b>Day 0</b>               | 0.188 (0.146-0.236)                                     |
|                       | Day 3                      | 0.617 (0.404-0.925)                                     |
|                       | Day 7                      | 8.506 (4.781-17.775)                                    |
|                       | Day 15                     | 122.600 (58.173-313.232)                                |
| <b>AVM@(CH+SL)1</b>   | <b>Day 0</b>               | 0.329 (0.265-0.403)                                     |
|                       | Day 3                      | 0.370 (0.231-0.564)                                     |
|                       | Day 7                      | 0.284 (0.159-0.465)                                     |
|                       | Day 15                     | 6.136 (4.130-9.823)                                     |
| <b>AVM@(CH+SL)3</b>   | <b>Day 0</b>               | 0.419 (0.341-0.511)                                     |
|                       | Day 3                      | 0.249 (0.149-0.392)                                     |
|                       | Day 7                      | 0.166 (0.086-0.283)                                     |
|                       | Day 15                     | 1.490 (1.076-2.101)                                     |
| <b>AVM@(CH+SL)5</b>   | <b>Day 0</b>               | 0.414 (0.337-0.504)                                     |
|                       | Day 3                      | 0.321 (0.198-0.492)                                     |
|                       | Day 7                      | 0.082 (0.038-0.150)                                     |
|                       | Day 15                     | 0.492 (0.344-0.686)                                     |
| <b>Commercial AVM</b> | <b>Day 0</b>               | 0.149 (0.114-0.190)                                     |
|                       | Day 3                      | 1.394 (0.878-8.277)                                     |
|                       | Day 7                      | 4.705 (2.755-9.144)                                     |
|                       | Day 15                     | 15.245 (9.427-27.544)                                   |
| <b>(CH+SL)</b>        | <b>Day 0</b>               | -                                                       |
|                       | Day 3                      | -                                                       |
|                       | Day 7                      | -                                                       |
|                       | Day 15                     | -                                                       |
